# Supplementary material for: Effects of peatland management on aquatic carbon concentrations and fluxes
Source: Copernicus journal article supplement (doi:10.5194/bg-19-1321-2022), 2022-03-04
Supplement: Supplementary file 1 [file bg-19-1321-2022-supplement.pdf]

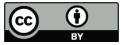

*Supplement of*

## **Effects of peatland management on aquatic carbon concentrations and fluxes**

**Amy E. Pickard et al.**

*Correspondence to:* Amy E. Pickard (amypic92@ceh.ac.uk)

The copyright of individual parts of the supplement might differ from the article licence.

**Supplementary information for bg-2021-65 “Effects of Peatland Management on Aquatic Carbon Concentrations and Fluxes”**

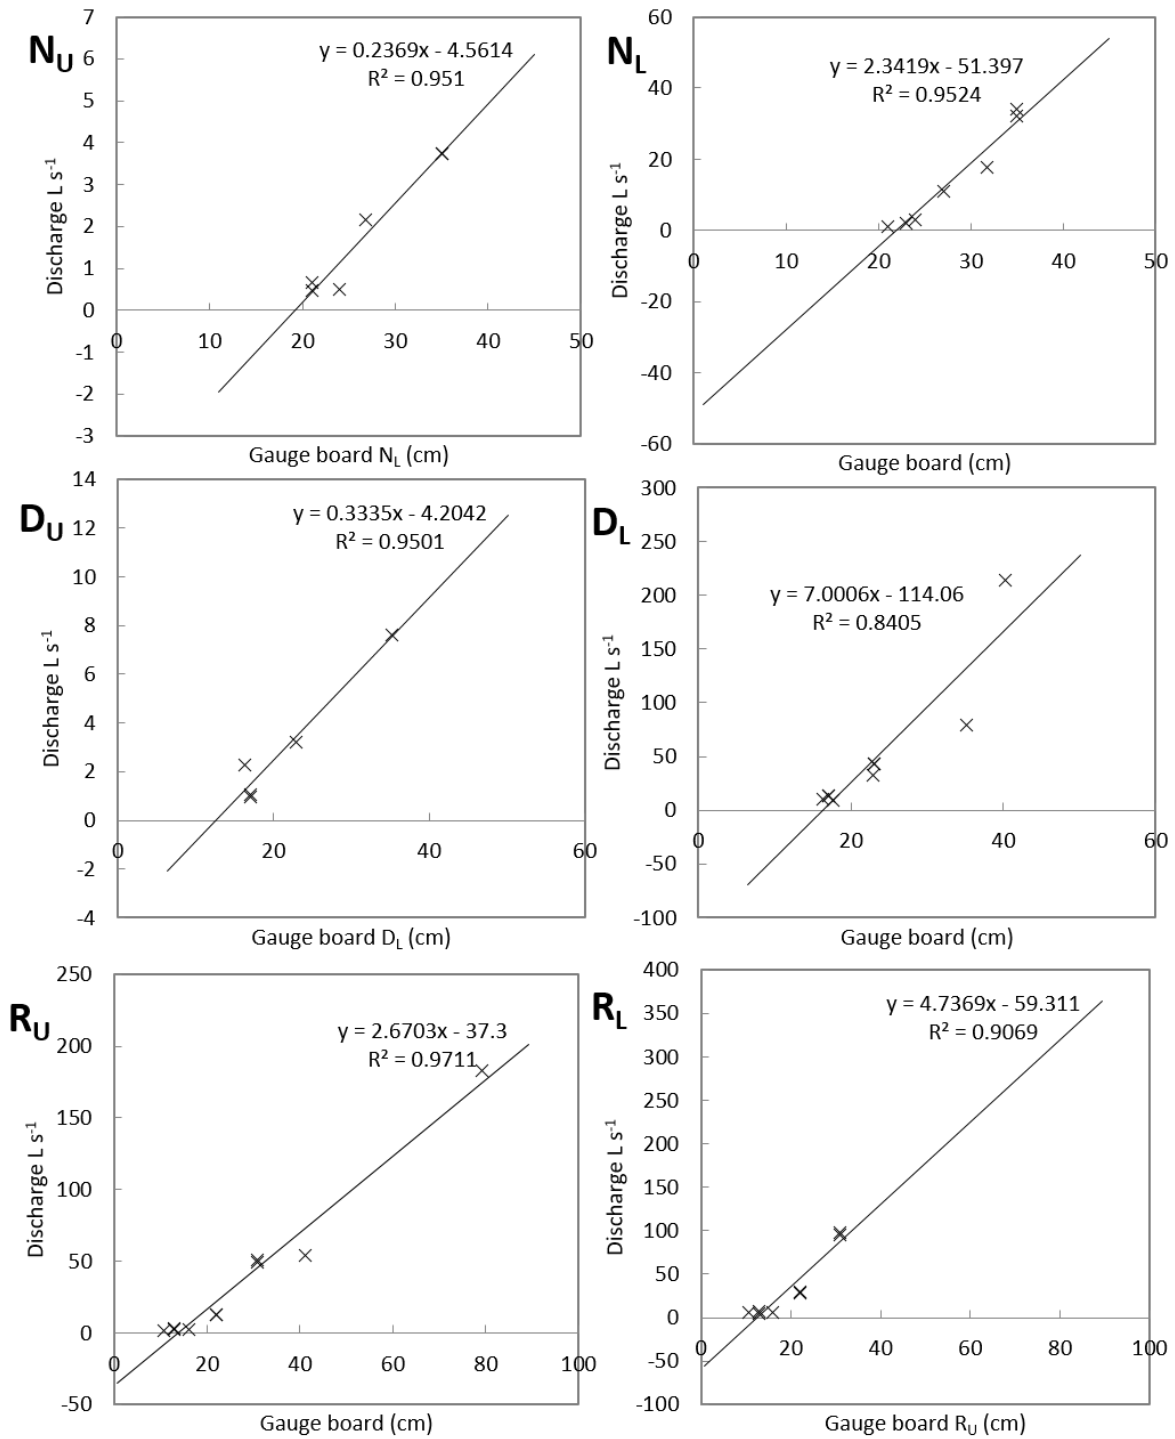

**Figure 1.** Stage-discharge rating curves for each sub-catchment: non drained (N), Drained (D), Restoration (R), and upper (U) and lower (L) sites within each land use type.

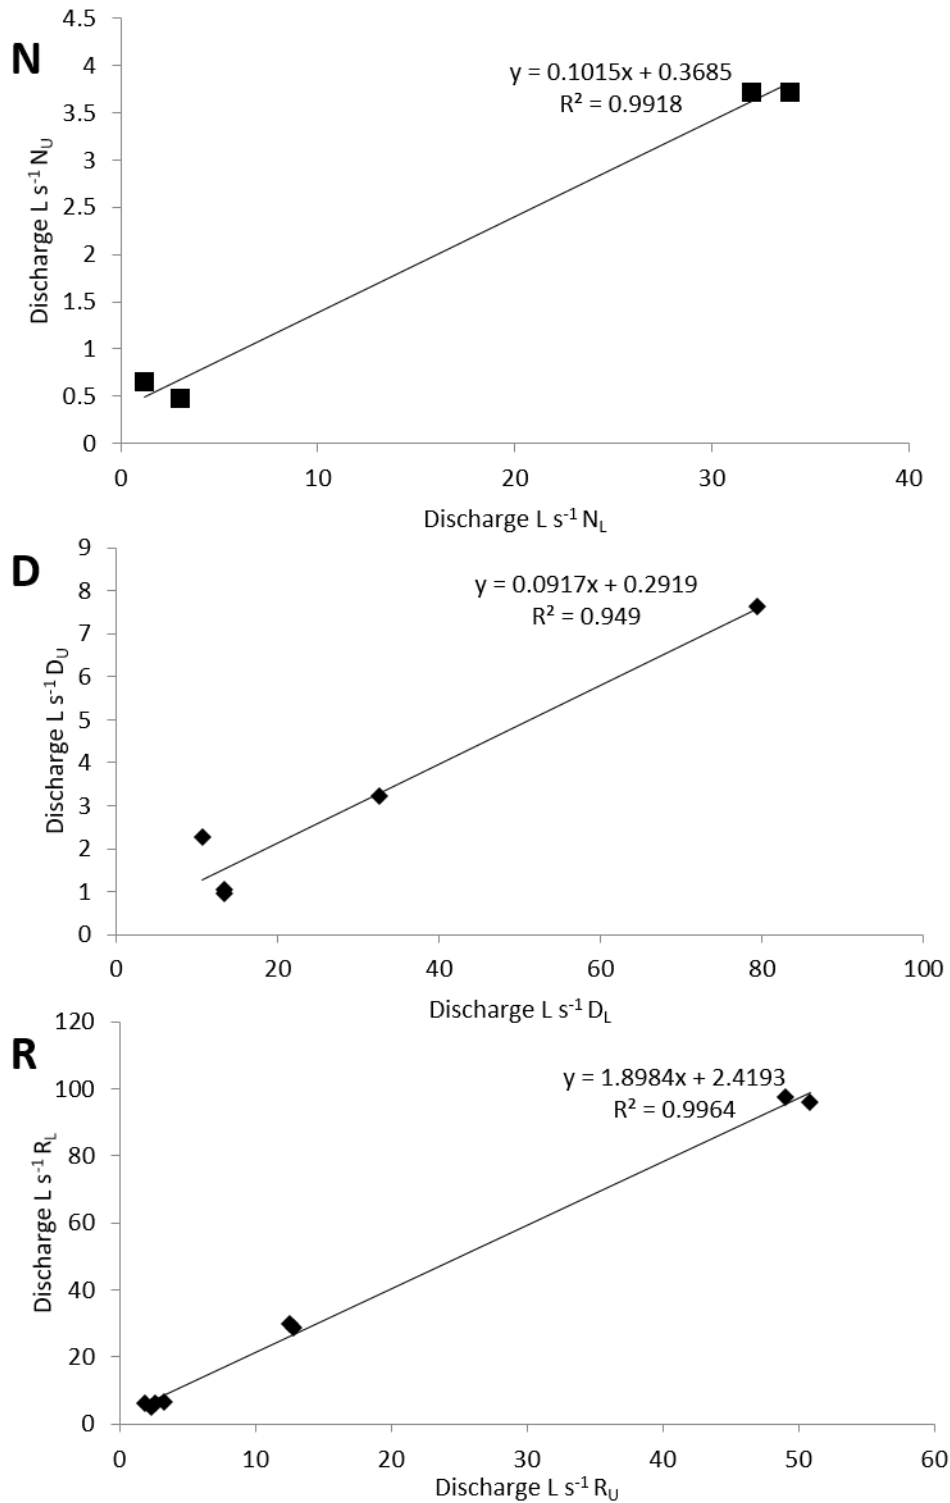

**Figure 2.** Dilution gauging measurements correlating discharge at the non-gauged sampling site to the catchment specific pressure transducer for each sub-catchment: non drained (N), Drained (D), Restoration (R).
